# Supplementary material for: Buprenorphine Dose and Time to Discontinuation Among Patients With Opioid Use Disorder in the Era of Fentanyl
Source: PubMed Central journal article supplement (PMC10507490; doi:10.1001/jamanetworkopen.2023.34540), 2023-09-18
Supplement: jamanetwopen-e2334540-s002.pdf [file jamanetwopen-e2334540-s002.pdf]

## Data Sharing Statement

Chambers. Buprenorphine Dose and Time to Discontinuation Among Patients With Opioid Use Disorder in the Era of Fentanyl. *JAMA Netw Open*. Published September 18, 2023.  
doi:10.1001/jamanetworkopen.2023.34540

### Data

**Data available:** No

### Additional Information

**Explanation for why data not available:** We used data from the Rhode Island Department of Health, which are subject to the data sharing policies and procedures of the agency.
